# Supplementary material for: Epigenetic changes induced by adenosine augmentation therapy prevent epileptogenesis
Source: JCI journal article supplement (doi:10.1172/jci65636), 2013-07-24
Supplement: sd1 [file 1]

**Table 1: Genes with increased methylation in epilepsy and decreased methylation during adenosine treatment.**

| Gene; name                                                                              | Accession #  | Probes | KA-N              | KA-N              | Ado-KA            | Ado-KA            | KA                | Ado               |
|-----------------------------------------------------------------------------------------|--------------|--------|-------------------|-------------------|-------------------|-------------------|-------------------|-------------------|
|                                                                                         |              |        | CH <sub>3</sub> ↓ | CH <sub>3</sub> ↑ | CH <sub>3</sub> ↓ | CH <sub>3</sub> ↑ | CH <sub>3</sub> ↑ | CH <sub>3</sub> ↓ |
| <b>Adra2b</b> ; adrenoceptor alpha 2B                                                   | NM_138505    | 19     | 0                 | 6                 | 6                 | 0                 | 32%               | 32%               |
| <b>Alg14</b> ; UDP-N-acetylglucosaminyltransferase subunit                              | NM_001014176 | 20     | 0                 | 5                 | 5                 | 0                 | 25%               | 25%               |
| <b>B4gal2</b> ; UDP-Gal:betaGlcNAc beta 1,4- galactosyltransferase, polypeptide2        | NM_001107965 | 20     | 0                 | 7                 | 9                 | 0                 | 35%               | 45%               |
| <b>Cald1</b> ; caldesmon 1                                                              | NM_013146    | 19     | 0                 | 5                 | 8                 | 0                 | 26%               | 42%               |
| <b>Cd14</b> ; Cluster of Differentiation 14 molecule                                    | NM_021744    | 18     | 0                 | 5                 | 8                 | 0                 | 28%               | 44%               |
| <b>Chst12</b> ; carbohydrate (chondroitin 4) sulfotransferase 12                        | NM_001037775 | 18     | 0                 | 8                 | 9                 | 0                 | 44%               | 50%               |
| <b>Coq6</b> ; coenzyme Q6 homolog, monooxygenase (S. cerevisiae)                        | NM_001011983 | 20     | 0                 | 5                 | 6                 | 0                 | 25%               | 30%               |
| <b>Ctbp2</b> ; C-terminal binding protein 2                                             | NM_053335    | 20     | 0                 | 5                 | 8                 | 0                 | 25%               | 40%               |
| <b>Cttnb1</b> ; catenin, beta like 1                                                    | NM_001024870 | 18     | 0                 | 5                 | 5                 | 1                 | 28%               | 28%               |
| <b>Cul3</b> ; cullin 3                                                                  | NM_001106923 | 20     | 0                 | 5                 | 5                 | 1                 | 25%               | 25%               |
| <b>Dbh</b> ; dopamine beta-hydroxylase (dopamine beta-monoxygenase)                     | NM_013158    | 20     | 0                 | 6                 | 17                | 0                 | 30%               | 85%               |
| <b>Dnajc28</b> ; DnaJ (Hsp40) homolog, subfamily C, member 28                           | NM_001014124 | 20     | 0                 | 6                 | 5                 | 0                 | 30%               | 25%               |
| <b>Fam83a</b> ; family with sequence similarity 83, member A                            | NM_001130576 | 20     | 0                 | 7                 | 17                | 0                 | 35%               | 85%               |
| <b>Fcgr2a</b> ; Fc fragment of IgG, low affinity IIa, receptor (CD32)                   | NM_053843    | 19     | 0                 | 5                 | 9                 | 0                 | 26%               | 47%               |
| <b>Ggt6</b> ; gamma-glutamyltransferase 6                                               | NM_001002820 | 19     | 0                 | 9                 | 15                | 0                 | 47%               | 79%               |
| <b>Gjb3</b> ; gap junction protein, beta 3                                              | NM_019240    | 15     | 0                 | 4                 | 7                 | 1                 | 27%               | 47%               |
| <b>Gnb3</b> ; guanine nucleotide binding protein (G protein), beta polypeptide 3        | NM_021858    | 20     | 0                 | 7                 | 10                | 0                 | 35%               | 50%               |
| <b>Gpr20</b> ; G protein-coupled receptor 20                                            | NM_022216    | 20     | 0                 | 5                 | 7                 | 1                 | 25%               | 35%               |
| <b>Gpr56</b> ; G protein-coupled receptor 56                                            | NM_152242    | 20     | 0                 | 5                 | 18                | 0                 | 25%               | 90%               |
| <b>H19</b> ; imprinted maternally expressed transcript (non-protein coding)             | NR_027324    | 20     | 0                 | 9                 | 15                | 0                 | 45%               | 75%               |
| <b>Hmha1</b> ; histocompatibility (minor) HA-1                                          | NM_001108067 | 20     | 0                 | 8                 | 14                | 0                 | 40%               | 70%               |
| <b>Kcna5</b> ; potassium voltage-gated channel, shaker-related subfamily, member 5      | NM_012972    | 18     | 0                 | 6                 | 6                 | 0                 | 33%               | 33%               |
| <b>Kcnd1</b> ; potassium voltage-gated channel, Shal-related subfamily, member1         | NM_001105748 | 20     | 0                 | 8                 | 14                | 0                 | 40%               | 70%               |
| <b>Kcnj13</b> ; potassium inwardly-rectifying channel, subfamily J, member 13           | NM_053608    | 20     | 1                 | 6                 | 9                 | 0                 | 30%               | 45%               |
| <b>Kntc1</b> ; kinetochore associated 1                                                 | NM_001107140 | 20     | 0                 | 5                 | 9                 | 0                 | 25%               | 45%               |
| <b>Krt17</b> ; keratin 17                                                               | NM_212545    | 20     | 0                 | 13                | 16                | 0                 | 65%               | 80%               |
| <b>Lamb2</b> ; laminin, beta 2                                                          | NM_012974    | 19     | 0                 | 11                | 11                | 0                 | 58%               | 58%               |
| <b>Lhb</b> ; luteinizing hormone beta polypeptide                                       | NM_012858    | 11     | 0                 | 5                 | 3                 | 0                 | 45%               | 27%               |
| <b>LOC500797</b> ; gene conserved in amniota                                            | NM_001109284 | 20     | 1                 | 8                 | 9                 | 0                 | 40%               | 45%               |
| <b>Matn1</b> ; matrilin 1, cartilage matrix protein                                     | NM_001006979 | 19     | 0                 | 5                 | 7                 | 2                 | 26%               | 37%               |
| <b>Mrgprd</b> ; MAS-related GPR, member D                                               | NM_001001506 | 17     | 0                 | 6                 | 8                 | 0                 | 35%               | 47%               |
| <b>Ndrgr4</b> ; NDRG family member 4                                                    | NM_031967    | 20     | 0                 | 9                 | 6                 | 0                 | 45%               | 30%               |
| <b>Nudt5</b> ; nudix (nucleoside diphosphate linked moiety X)-type motif 5              | NM_001007733 | 20     | 1                 | 7                 | 6                 | 3                 | 35%               | 30%               |
| <b>Olr804</b> ; olfactory receptor 804                                                  | NM_001000852 | 20     | 0                 | 6                 | 11                | 0                 | 30%               | 55%               |
| <b>Otop2</b> ; otopenin 2                                                               | NM_001105851 | 20     | 0                 | 7                 | 5                 | 0                 | 35%               | 25%               |
| <b>Pak7</b> ; p21 protein (Cdc42/Rac)-activated kinase 7                                | NM_001107781 | 20     | 0                 | 5                 | 6                 | 0                 | 25%               | 30%               |
| <b>Pold1</b> ; polymerase (DNA directed), delta 1, catalytic subunit                    | NM_021662    | 20     | 0                 | 5                 | 15                | 0                 | 25%               | 75%               |
| <b>Polr1e</b> ; polymerase (RNA) I polypeptide E                                        | NM_001107938 | 17     | 0                 | 8                 | 8                 | 0                 | 47%               | 47%               |
| <b>Prima1</b> ; proline rich membrane anchor 1                                          | NM_001108721 | 20     | 0                 | 7                 | 7                 | 0                 | 35%               | 35%               |
| <b>Ptgsd</b> ; prostaglandin D2 synthase 21kDa (brain)                                  | NM_013015    | 20     | 0                 | 5                 | 11                | 0                 | 25%               | 55%               |
| <b>Pycr1</b> ; pyrroline-5-carboxylate reductase 1                                      | NM_001105857 | 19     | 0                 | 5                 | 14                | 0                 | 26%               | 74%               |
| <b>Rassf7</b> ; Ras association (RalGDS/AF-6) domain family (N-terminal) member 7       | NM_001106317 | 20     | 0                 | 5                 | 7                 | 0                 | 25%               | 35%               |
| <b>RGD1305347</b> ; uncharacterized protein LOC362576                                   | NM_001108674 | 20     | 0                 | 5                 | 12                | 0                 | 25%               | 60%               |
| <b>RGD1563425</b> ; uncharacterized protein LOC498129                                   | NM_001109059 | 17     | 0                 | 5                 | 5                 | 0                 | 29%               | 29%               |
| <b>Rps6kl1</b> ; ribosomal protein S6 kinase-like 1                                     | NM_001106745 | 20     | 0                 | 6                 | 17                | 0                 | 30%               | 85%               |
| <b>Rsrc2</b> ; arginine/serine-rich coiled-coil 2                                       | NM_001014128 | 20     | 0                 | 5                 | 9                 | 0                 | 25%               | 45%               |
| <b>Selplg</b> ; selectin P ligand                                                       | NM_001013230 | 19     | 0                 | 7                 | 5                 | 0                 | 37%               | 26%               |
| <b>Slc16a10</b> ; solute carrier family 16, member 10 (aromatic amino acid transporter) | NM_138831    | 20     | 0                 | 5                 | 6                 | 0                 | 25%               | 30%               |
| <b>Slc24a6</b> ; solute carrier family 24 (sodium/lithium/calcium exchanger), member 6  | NM_001017488 | 20     | 0                 | 8                 | 10                | 0                 | 40%               | 50%               |
| <b>Slc46a2</b> ; solute carrier family 46, member 2                                     | NM_001106652 | 20     | 0                 | 5                 | 10                | 0                 | 25%               | 50%               |
| <b>Snrpn</b> ; small nuclear ribonucleoprotein polypeptide N                            | NM_031117    | 11     | 0                 | 4                 | 4                 | 0                 | 36%               | 36%               |
| <b>Stk35</b> ; serine/threonine kinase 35                                               | NM_001107773 | 17     | 0                 | 5                 | 6                 | 0                 | 29%               | 35%               |
| <b>Sult1c2</b> ; sulfotransferase family, cytosolic, 1C, member 2                       | NM_133547    | 19     | 1                 | 5                 | 5                 | 0                 | 26%               | 26%               |
| <b>Syncn</b> ; syncollin                                                                | NM_139086    | 18     | 0                 | 6                 | 12                | 0                 | 33%               | 67%               |
| <b>Tbxa2r</b> ; thromboxane A2 receptor                                                 | NM_017054    | 20     | 0                 | 6                 | 6                 | 1                 | 30%               | 30%               |
| <b>Tcirg1</b> ; T-cell, immune regulator 1                                              | NM_199089    | 20     | 0                 | 11                | 13                | 0                 | 55%               | 65%               |
| <b>Tessp1</b> ; protease, serine, 41                                                    | NM_001135087 | 19     | 0                 | 6                 | 9                 | 0                 | 32%               | 47%               |
| <b>Tessp2</b> ; protease, serine, 42                                                    | NM_001106863 | 19     | 0                 | 5                 | 9                 | 0                 | 26%               | 47%               |
| <b>Tnni2</b> ; troponin I type 2 (skeletal, fast)                                       | NM_017185    | 20     | 0                 | 5                 | 7                 | 0                 | 25%               | 35%               |
| <b>Tnxa</b> ; tenascin XA (pseudogene)                                                  | NR_024118    | 19     | 0                 | 6                 | 11                | 0                 | 32%               | 58%               |
| <b>Txnip</b> ; thioredoxin interacting protein                                          | NM_001008767 | 20     | 0                 | 6                 | 8                 | 0                 | 30%               | 40%               |
| <b>Tymp</b> ; thymidine phosphorylase                                                   | NM_001012122 | 20     | 0                 | 5                 | 5                 | 1                 | 25%               | 25%               |
| <b>Wisp1</b> ; WNT1 inducible signaling pathway protein 1                               | NM_031716    | 20     | 0                 | 8                 | 7                 | 0                 | 40%               | 35%               |
| <b>Znf524</b> ; zinc finger protein 524                                                 | NM_001108905 | 20     | 0                 | 7                 | 10                | 0                 | 35%               | 50%               |
| <b>Znf541</b> ; zinc finger protein 541                                                 | NM_001107458 | 19     | 0                 | 5                 | 12                | 0                 | 26%               | 63%               |
| <b>Znf710</b> ; zinc finger protein 710                                                 | NM_001134563 | 19     | 0                 | 5                 | 10                | 0                 | 26%               | 53%               |

**Table 1: Genes with increased methylation in epilepsy and decreased methylation during adenosine treatment.** Individual targets from Fig. 6B that show increased methylation status ( $\text{CH}_3\uparrow$ ) in epilepsy (9 weeks after KA vs. naive control: ‘KA-N’) and decreased methylation status ( $\text{CH}_3\downarrow$ ) during adenosine treatment [(9 wk KA + 5 d Ado) vs. 9 wk KA: ‘Ado-KA’) are shown. For a complete list of targets please refer to Gene Expression Omnibus (tracking number 16742404). Column 1: gene symbols and names according to the HUGO Gene Nomenclature Committee; column 2: gene accession number according to the National Center for Biotechnology Information; column 3: number of different probes for each gene represented on the array; column 4: KA-N  $\text{CH}_3\downarrow$ , number of probes with reduced methylation in epileptic vs. control rats; note that the majority of probes does not show reduced methylation in epilepsy; column 5: KA-N  $\text{CH}_3\uparrow$ , number of probes with increased methylation in epilepsy; column 6: Ado-KA  $\text{CH}_3\downarrow$ , number of probes with reduced methylation during adenosine treatment; column 7: Ado-KA  $\text{CH}_3\uparrow$ , number of probes with increased methylation during adenosine treatment; note that the majority of probes does not show increased methylation during adenosine treatment; column 8: KA  $\text{CH}_3\uparrow$  percentage of probes with increased methylation in epilepsy; column 9: Ado  $\text{CH}_3\downarrow$  percentage of probes with reduced methylation during adenosine treatment.
